# Supplementary material for: Retrospective Exposure Estimation and Predicted versus Observed Serum Perfluorooctanoic Acid Concentrations for Participants in the C8 Health Project
Source: PubMed Central journal article supplement (PMC3261988; doi:10.1289/ehp.1103729), 2011-08-03
Supplement: ehp.1103729.s001.pdf [file ehp.1103729.s001.pdf]

## **Supplemental Material**

### **Retrospective Exposure Estimation and Predicted versus Observed Serum Perfluorooctanoic Acid Concentrations for Participants in the C8 Health Project**

Hyeong-Moo Shin<sup>1</sup>, Verónica M. Vieira<sup>2</sup>, P. Barry Ryan<sup>3</sup>, Kyle Steenland<sup>3,4</sup>, and Scott M. Bartell<sup>5</sup>

<sup>1</sup>School of Social Ecology, University of California, Irvine, California, USA

<sup>2</sup>Department of Environmental Health, Boston University, Boston, Massachusetts, USA

<sup>3</sup>Department of Environmental Health, Emory University, Atlanta, Georgia, USA

<sup>4</sup>C8 Science Panel (<http://www.c8sciencepanel.org>)

<sup>5</sup>Program in Public Health, Department of Statistics, and Department of Epidemiology,  
University of California, Irvine, California, USA

## TABLE OF CONTENTS

|                                                                                                                                                                                                                                                                                                                                                                     |          |
|---------------------------------------------------------------------------------------------------------------------------------------------------------------------------------------------------------------------------------------------------------------------------------------------------------------------------------------------------------------------|----------|
| <b>Tables &amp; Figures .....</b>                                                                                                                                                                                                                                                                                                                                   | <b>3</b> |
| Supplemental Material, Table 1. Summary of exposure concentrations assignment by data type .....                                                                                                                                                                                                                                                                    | 3        |
| Supplemental Material, Table 2. The cord: maternal PFOA ratio in blood based on literature review                                                                                                                                                                                                                                                                   | 4        |
| Supplemental Material, Figure 2. A log-log plot of predicted vs. observed concentrations from a<br>random sample of 1000 participants drawn from all participants. Linear trends are shown as a<br>solid line and predicted and observed concentrations are shown as points.....                                                                                    | 5        |
| Supplemental Material, Figure 3. A log-log plot of predicted vs. observed concentrations for<br>participants (n =1,074) who had same residence & workplace in 1 of 6 water districts from<br>2001 to 2005 and provided water consumption information. Linear trends are shown as a<br>solid line and predicted and observed concentrations are shown as points..... | 6        |
| Supplemental Material, Table 3. Summary of contribution of maternal transfer to children by specific<br>age range excluding Little Hocking children .....                                                                                                                                                                                                           | 7        |
| Supplemental Material, Figure 4. Relative contribution of air inhalation exposure to total exposure<br>from the Washington Works facility (%) as a function of time for each water district.<br>Exposure was averaged based on historical water district .....                                                                                                      | 8        |
| <b>References .....</b>                                                                                                                                                                                                                                                                                                                                             | <b>9</b> |

## TABLES & FIGURES

**Supplemental Material, Table 1. Summary of exposure concentrations assignment by data type**

| WD <sup>a</sup> code | Data Type (n)                | Geographic Location                 | Number of Records | Air conc.           | Water source                        |
|----------------------|------------------------------|-------------------------------------|-------------------|---------------------|-------------------------------------|
| 1-6<br>(n=65,470)    | Geocode +ZIP<br>(n=64,679)   | Inside Air & Inside GW <sup>b</sup> | 22,689            | X, Y                | Public                              |
|                      |                              | Inside Air & Outside GW             | 16,706            |                     |                                     |
|                      |                              | Outside Air & Outside GW            | 25,284            | 0                   |                                     |
|                      | No Geocode+ ZIP<br>(n=791)   | Inside Air & Inside GW              | 12                | X, Y (ZIP centroid) | Public                              |
|                      |                              | Inside Air & Outside GW             | 148               |                     |                                     |
|                      |                              | Outside Air & Outside GW            | 631               | 0                   |                                     |
| 7,8,0<br>(n=85,154)  | Geocode +ZIP<br>(n=78,992)   | Inside Air & Inside GW              | 1,181             | X, Y                | Private                             |
|                      |                              | Inside Air & Outside GW             | 23,161            |                     | Private <sup>c</sup>                |
|                      |                              | Outside Air & Outside GW            | 54,650            | 0                   | 0                                   |
|                      | No Geocode+ ZIP<br>(n=5,082) | Inside Air & Inside GW              | 65                | X, Y (ZIP centroid) | Private                             |
|                      |                              | Inside Air & Outside GW             | 448               |                     | Private <sup>c</sup>                |
|                      |                              | Outside Air & Outside GW            | 4,569             | 0                   | 0                                   |
|                      | No Geocode+ No ZIP (n=1,080) | NA                                  | 1,080             | 0                   | 0                                   |
| blank<br>(n=1,247)   | Geocode +ZIP<br>(n=1,174)    | Inside Air & Inside GW              | 97                | X, Y                | Mix (Public, Private)               |
|                      |                              | Inside Air & Outside GW             | 235               |                     | Mix (Public, Private <sup>c</sup> ) |
|                      |                              | Outside Air & Outside GW            | 842               | 0                   | Mix (Public, Private=0)             |
|                      | No Geocode+ ZIP<br>(n=73)    | Inside Air & Inside GW              | 0                 | X, Y (ZIP centroid) | Mix (Public, Private)               |
|                      |                              | Inside Air & Outside GW             | 33                |                     | Mix (Public, Private <sup>c</sup> ) |
|                      |                              | Outside Air & Outside GW            | 40                | 0                   | Mix (Public, Private=0)             |
| Total                | 151,871                      |                                     | 151,871           |                     |                                     |

<sup>a</sup> Water district code reported in the study

<sup>b</sup> Groundwater model domain

<sup>c</sup> Private well concentrations from the vadose zone model for outside groundwater model domain

**Supplemental Material, Table 2. The cord: maternal PFOA ratio in blood based on literature review**

| Reference                                            | Sample size | PFOA ratio | Method of estimating the PFOA ratio |
|------------------------------------------------------|-------------|------------|-------------------------------------|
| Fromme et al. (2010)<br>regression equation          | 27          | 0.745      | calculated using the provided       |
| Kim et al. (2011)<br>regression equation             | 20          | 0.694      | calculated using the provided       |
| Midasch et al. (2007)                                | 11          | 1.260      | provided mean of ratio              |
| Fei et al. (2007)<br>mean ratio of maternal:cord     | 50          | 0.680      | calculated from provided            |
| Needham et al. (2010)                                | 12          | 0.720      | provided median of ratio            |
| Monroy et al. (2008)<br>mean                         | 101         | 0.866      | calculated ratio of provided        |
| Hanssen et al. (2020)<br>mean ratio of maternal:cord | 58          | 0.710      | calculated from provided            |

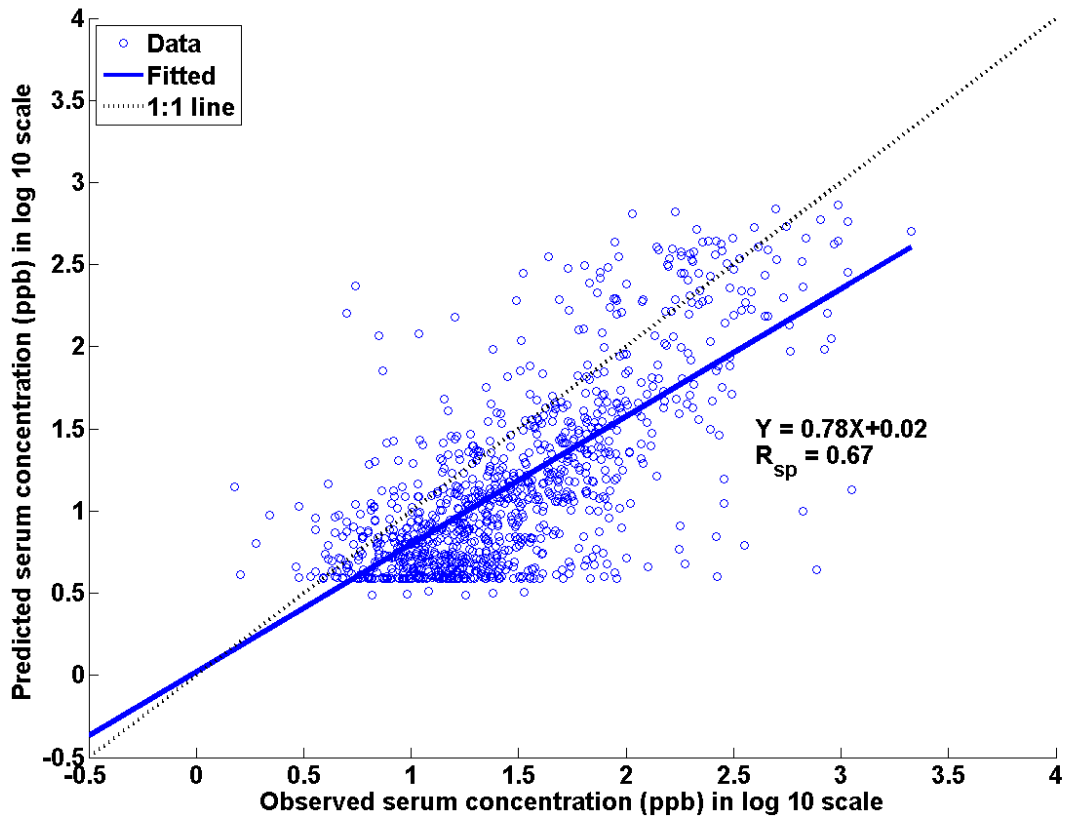

**Supplemental Material, Figure 2. A log-log plot of predicted vs. observed concentrations from a random sample of 1000 participants drawn from all participants. Linear trends are shown as a solid line and predicted and observed concentrations are shown as points.**

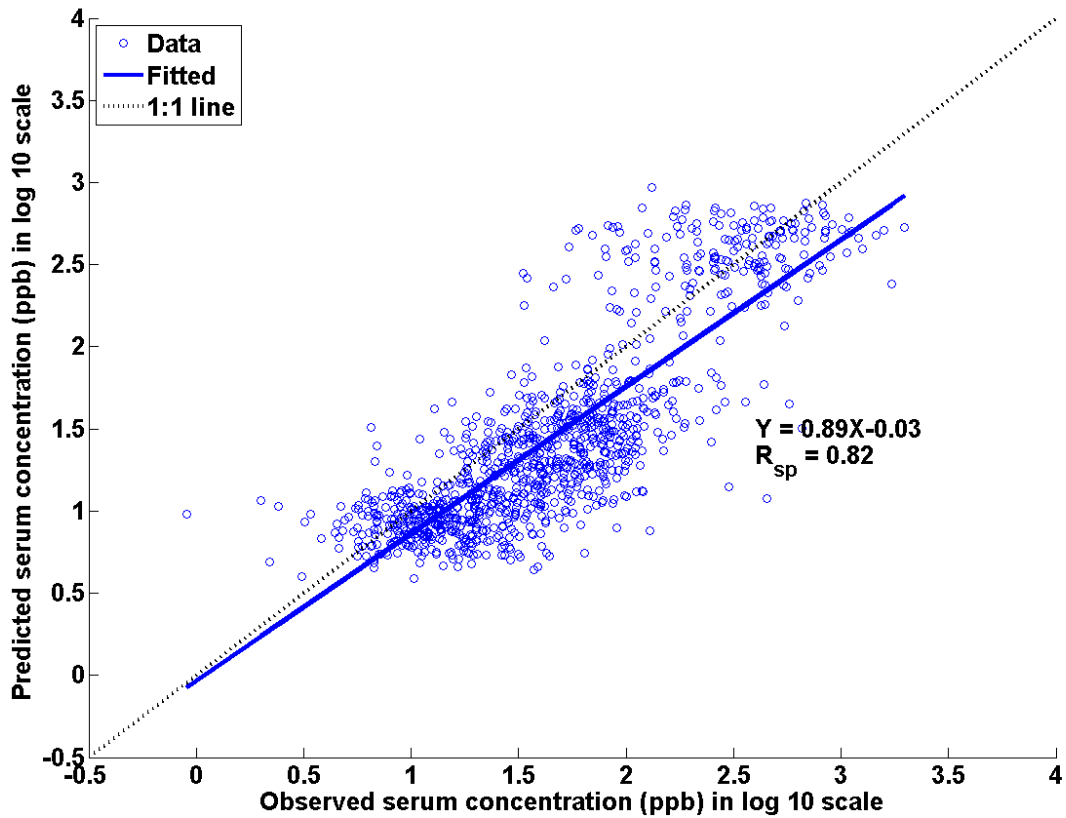

**Supplemental Material, Figure 3. A log-log plot of predicted vs. observed concentrations for participants (n =1,074) who had same residence & workplace in 1 of 6 water districts from 2001 to 2005 and provided water consumption information. Linear trends are shown as a solid line and predicted and observed concentrations are shown as points.**

**Supplemental Material, Table 3. Summary of contribution of maternal transfer to children by specific age range excluding Little Hocking children**

| Source |      | No maternal transfer |                        | Maternal transfer |                        |                       |
|--------|------|----------------------|------------------------|-------------------|------------------------|-----------------------|
| Age    | N    | R <sub>sp</sub>      | Predicted median (ppb) | R <sub>sp</sub>   | Predicted median (ppb) | Observed median (ppb) |
| 1-2    | 7    | 0.00                 | 8.7                    | 0.61              | 33.9                   | 19.0                  |
| 2-3    | 93   | 0.32                 | 7.6                    | 0.66              | 30.0                   | 27.3                  |
| 3-4    | 136  | 0.44                 | 15.2                   | 0.50              | 34.4                   | 21.1                  |
| 4-5    | 198  | 0.60                 | 18.2                   | 0.58              | 34.0                   | 21.3                  |
| 5-6    | 213  | 0.50                 | 19.8                   | 0.68              | 28.3                   | 24.9                  |
| 6-7    | 281  | 0.58                 | 20.3                   | 0.62              | 28.5                   | 24.4                  |
| 7-8    | 336  | 0.59                 | 21.1                   | 0.65              | 28.0                   | 23.6                  |
| 8-9    | 376  | 0.46                 | 17.1                   | 0.55              | 21.0                   | 19.0                  |
| Total  | 1692 | 0.52                 | 17.8                   | 0.61              | 28.5                   | 22.7                  |

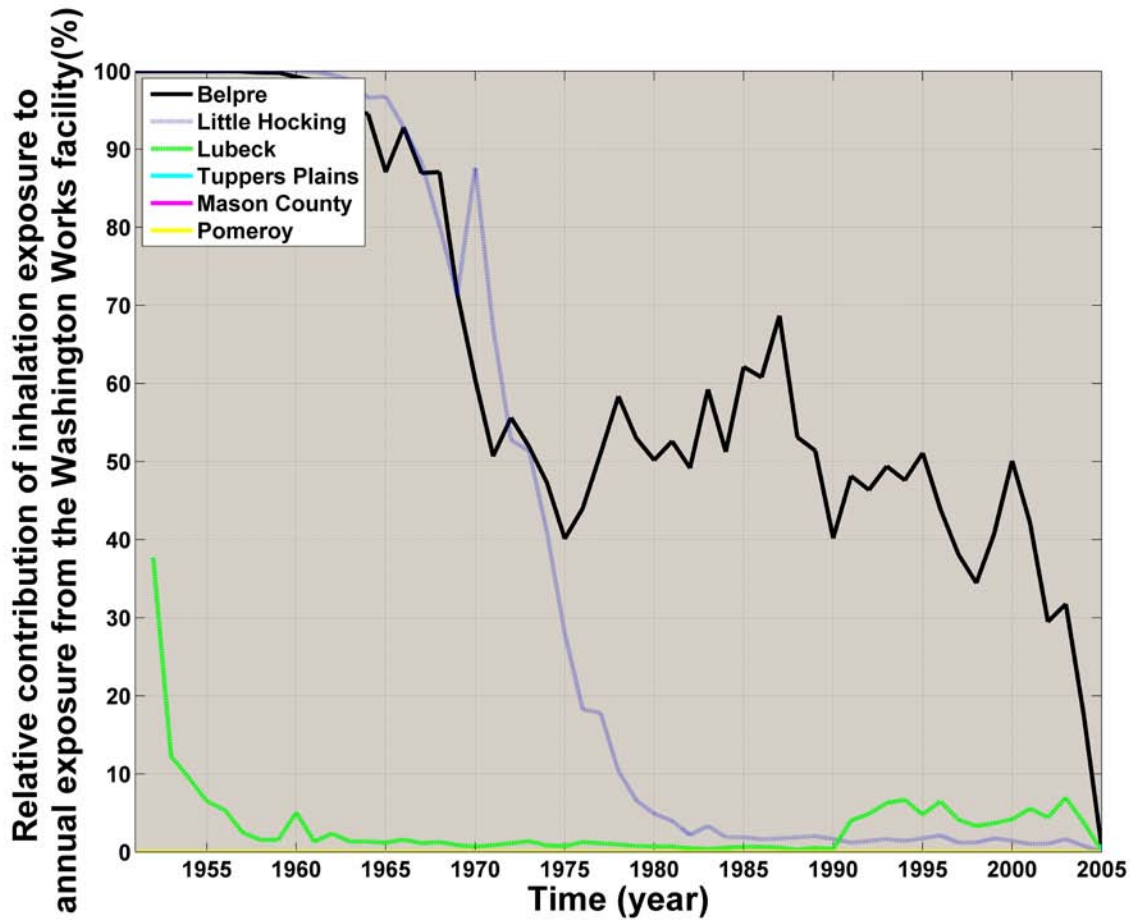

Supplemental Material, Figure 4. Relative contribution of air inhalation exposure to annual PFOA exposure from the Washington Works facility (%) as a function of time for each water district. Exposure was averaged based on historical water district



## REFERENCES

- Fei CY, McLaughlin JK, Tarone RE, Olsen J. 2007. Perfluorinated chemicals and fetal growth: A study within the Danish National Birth Cohort. *Environ Health Perspect* 115:1677–1682.
- Fromme H, Mosch C, Morovitz M, Alba-Alejandre I, Boehmer S, Kiranoglu M, et al. 2010. Pre- and Postnatal Exposure to Perfluorinated Compounds (PFCs). *Environ Sci Technol* 44:7123–7129.
- Hanssen L, Roellin H, Odland JO, Moe MK, Sandanger TM. 2010. Perfluorinated compounds in maternal serum and cord blood from selected areas of South Africa: results of a pilot study. *J Environ Monitor* 12(6): 1355–1361.
- Kim SK, Lee KT, Kang CS, Tao L, Kannan K, Kim KR, et al. 2011. Distribution of perfluorochemicals between sera and milk from the same mothers and implications for prenatal and postnatal exposures. *Environ Pollut* 159(1): 169–174.
- Midasch O, Drexler H, Hart N, Beckmann MW, Angerer J. 2007. Transplacental exposure of neonates to perfluorooctanesulfonate and perfluorooctanoate: a pilot study. *Int Arch Occ Env Hea* 80(7):643–648.
- Monroy R, Morrison K, Teo K, Atkinson S, Kubwabo C, Stewart B, et al. 2008. Serum levels of perfluoroalkyl compounds in human maternal and umbilical cord blood samples. *Environ Res* 108(1):56–62.
- Needham LL, Gandjean P, Heinzow B, Jorgensen PL, Nielsen F, Patterson DG, Sjodin A, Turner WE, Weihe P. 2011. Partition of environmental chemicals between maternal and fetal blood and tissues. *Environ Sci Technol* 45:1121-1126.
